# Supplementary material
Source: Springer Nature journal article supplement (https://www.springermedizin.de/resource/supplementary/12885_2010_2571_MOESM8_ESM.pdf/9462586)

**A**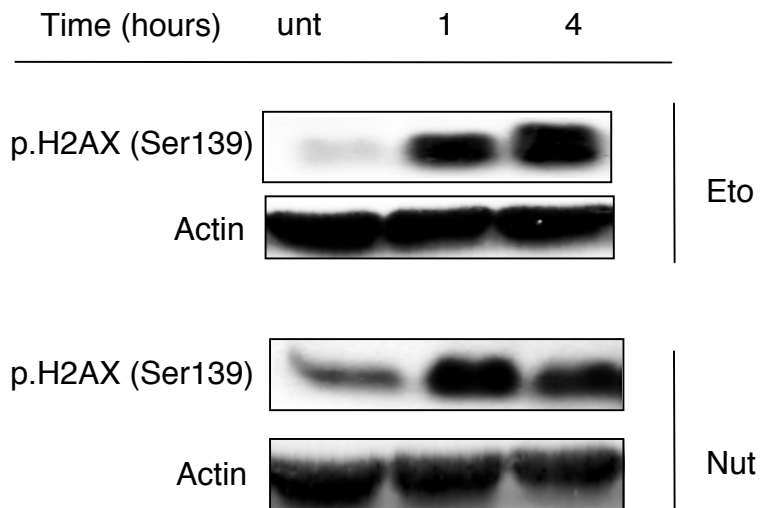**B**HCT116 <sup>p53+/+</sup>

Control

Etoposide

Nutlin-3

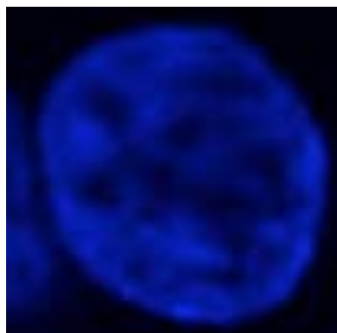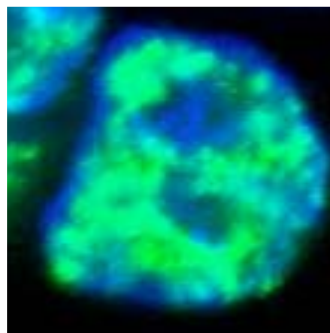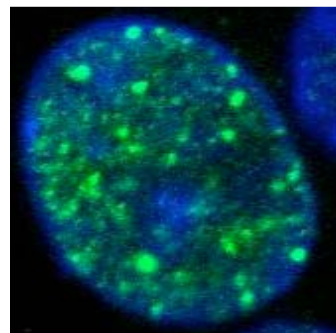

Supplement: MOESM8 [file 9462586]
